# Supplementary material for: Effects of Phloem-Feeding Pest, Dalbulus maidis on Morphological Expression of Drought-Tolerant Traits in Maize
Source: MDPI journal article supplement (doi:10.3390/stresses2030023), 2022-09-01
Supplement: s1 [file s1]

# Effects of Phloem-Feeding Pest, *Dalbulus maidis* on Morphological Expression of Drought-Tolerant Traits in Maize

## Supplementary Data:

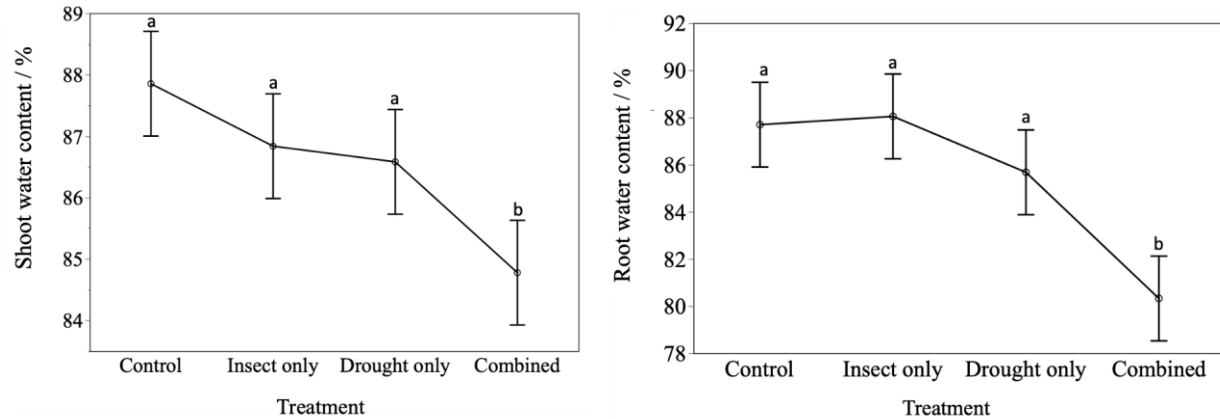

Supplemental Figure S1. Shoot and root water content during *Dalbulus maidis*, drought and combined stress in drought-tolerant maize hybrids (Midwest × South 1, Midwest × South 2 and South × South). Shoot and root water contents were calculated using the formula [(fresh weight, g – dry weight, g) / fresh weight, g \*100]. Shoot moisture content ( $F_{3,3}=8.88$   $p$ , <0.0001), Root moisture content (Treatment  $F_{3,3}$ , 15.45  $p$ , <0.0001). Line graph is created based on mean values from all three drought-tolerant hybrids (LH195 × TX772, LH195 × TX773, and TX790 × TX777). Interval bars represents 95% confidence levels on the connected line graph. Levels not connected by same letter are significantly different by Tukey HSD ( $\alpha= 0.05$   $Q=2.61$ ).
