# Supplementary material for: Effects of Phloem-Feeding Pest, Dalbulus maidis on Morphological Expression of Drought-Tolerant Traits in Maize
Source: MDPI journal article supplement (doi:10.3390/stresses2030023), 2022-09-01
Supplement: s1 [file s1]

Archive with 1 entries (1 files):
- stresses-1805540-supplementary.pdf
